# Supplementary material for: 3D nitrogen-doped hierarchical porous carbon framework for protecting sulfur cathode in lithium–sulfur batteries
Source: Royal Society of Chemistry journal article supplement (doi:10.1039/c9nj01017c), 2019-01-01
Supplement: c9nj01017c1.pdf [file c9nj01017c1.pdf]

Electronic Supplementary Information (ESI)

**3D nitrogen doped hierarchical porous carbon framework for  
protecting sulfur cathode in lithium sulfur batteries**

Yan Song, He Wang, Qianli Ma, Dan Li, Jinxian Wang, Guixia Liu, Ying Yang, Xiangting Dong\*,  
and Wensheng Yu\*

School of Chemistry and environmental engineering, Changchun University of Science and  
Technology, Changchun 130022, China.

\*corresponding authors: E-mail: dongxiangting888@163.com, wenshengyu2009@sina.com

## Supplementary Figures

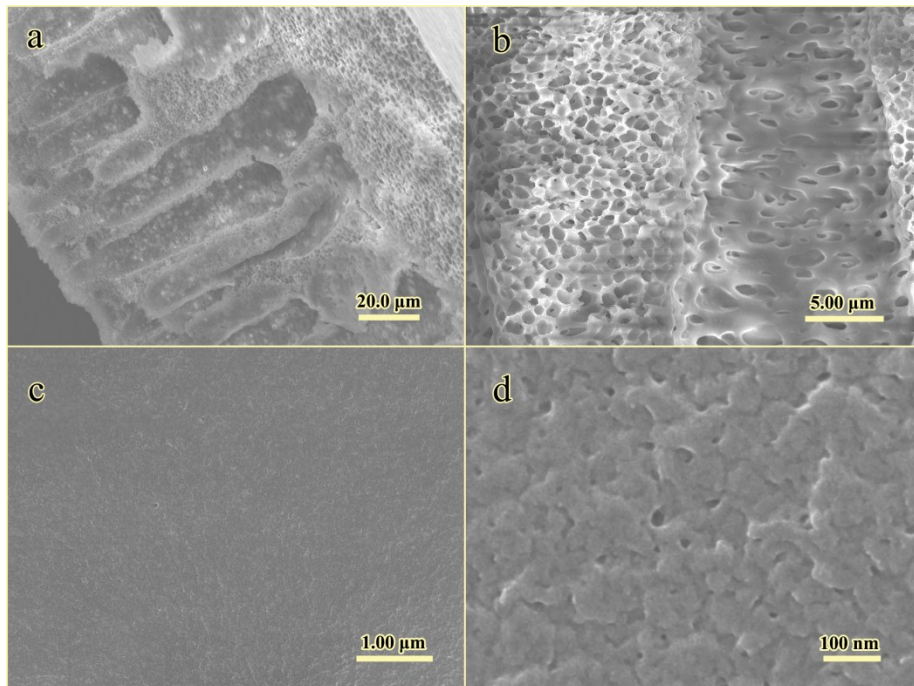

Fig. S1 Morphological features of (a, b) cross-section and (c, d) surface of the hierarchical porous PAN framework.

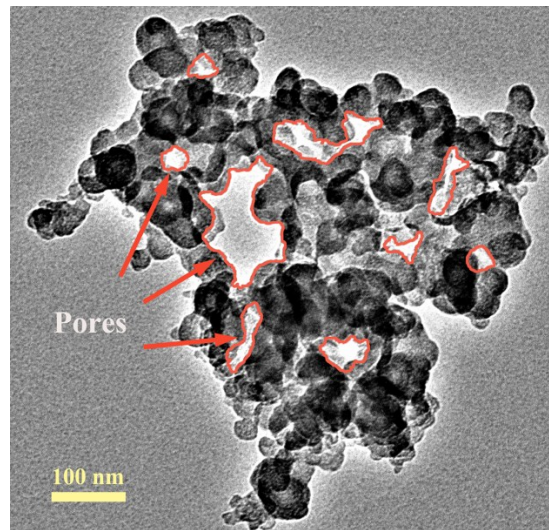

Fig. S2 Transmission electron microscopy (TEM) image of the NHPCF.

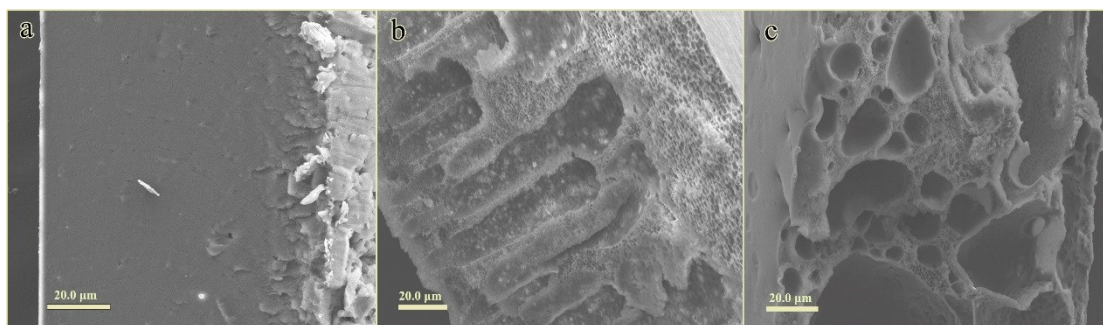

Fig. S3 Field-emission scanning electron microscopy (FE-SEM) images of the PAN framework at different ratio of PAA to PAN in the precursor (a. 0:1, b. 1:2, c.1:1).

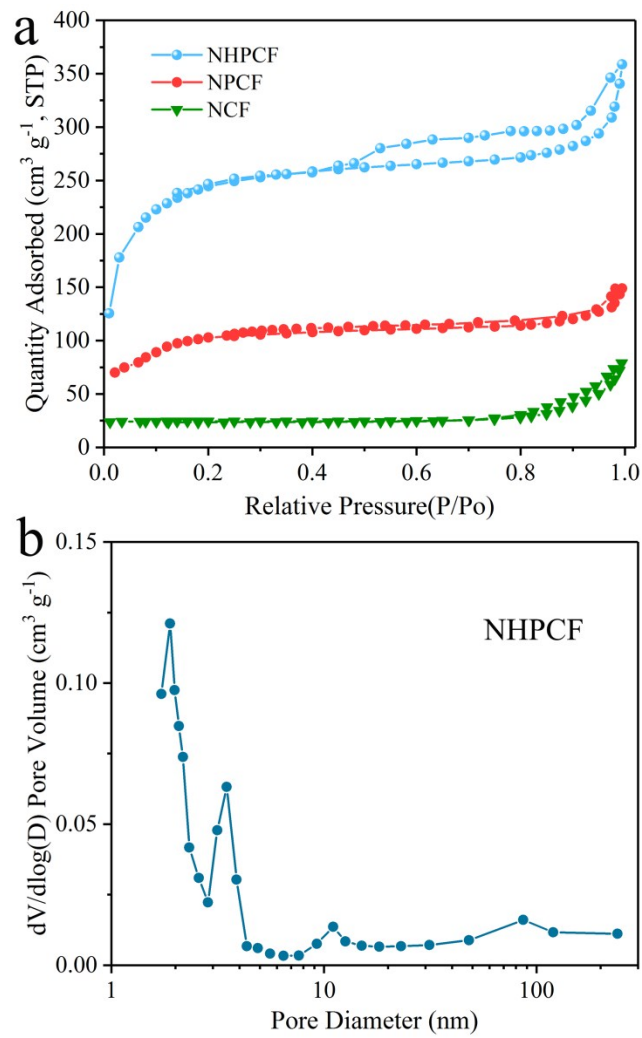

Fig. S4 (a)  $\text{N}_2$  adsorption/desorption isotherms of NHPCF, NPCF, and NCF sample; (b) pore size distributions for NHPCF.

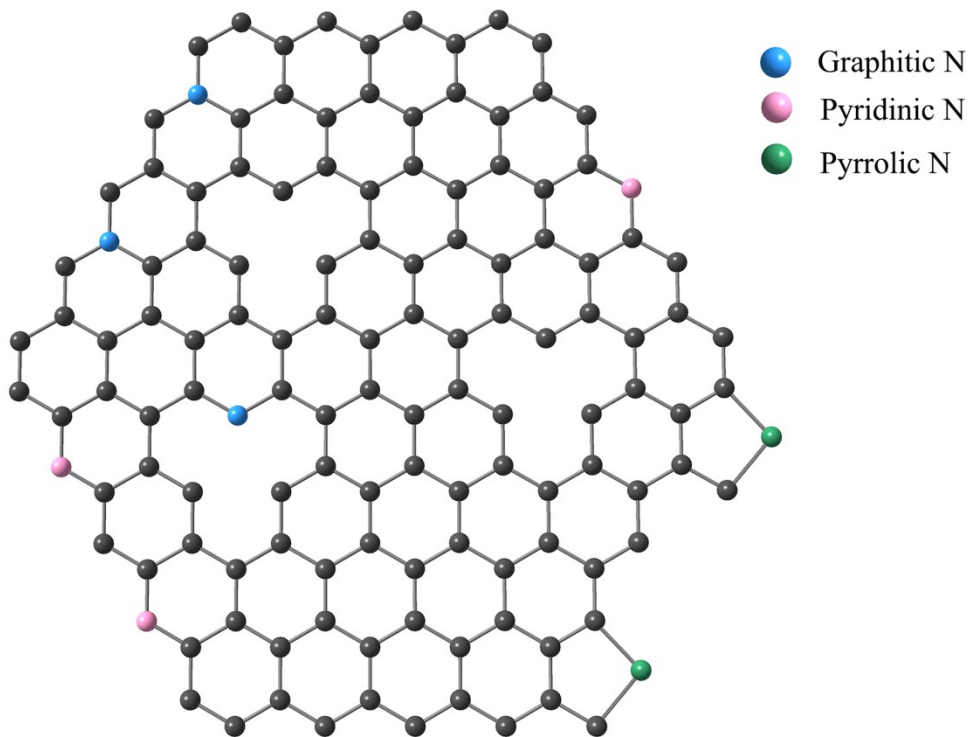

Fig. S5 Schematic configuration of NHPCF with various nitrogen atoms.

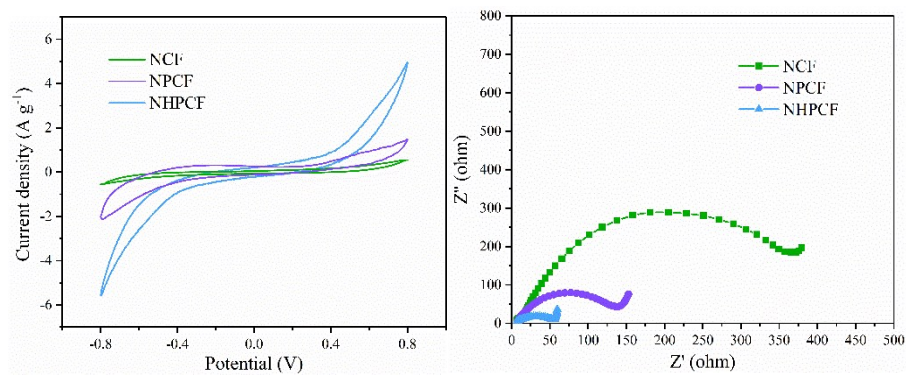

Fig. S6 (a) cyclic voltammograms and (b) electrochemical impedance spectra of symmetric batteries with two identical electrodes and the electrolyte containing Li<sub>2</sub>S<sub>6</sub> (0.5 M)

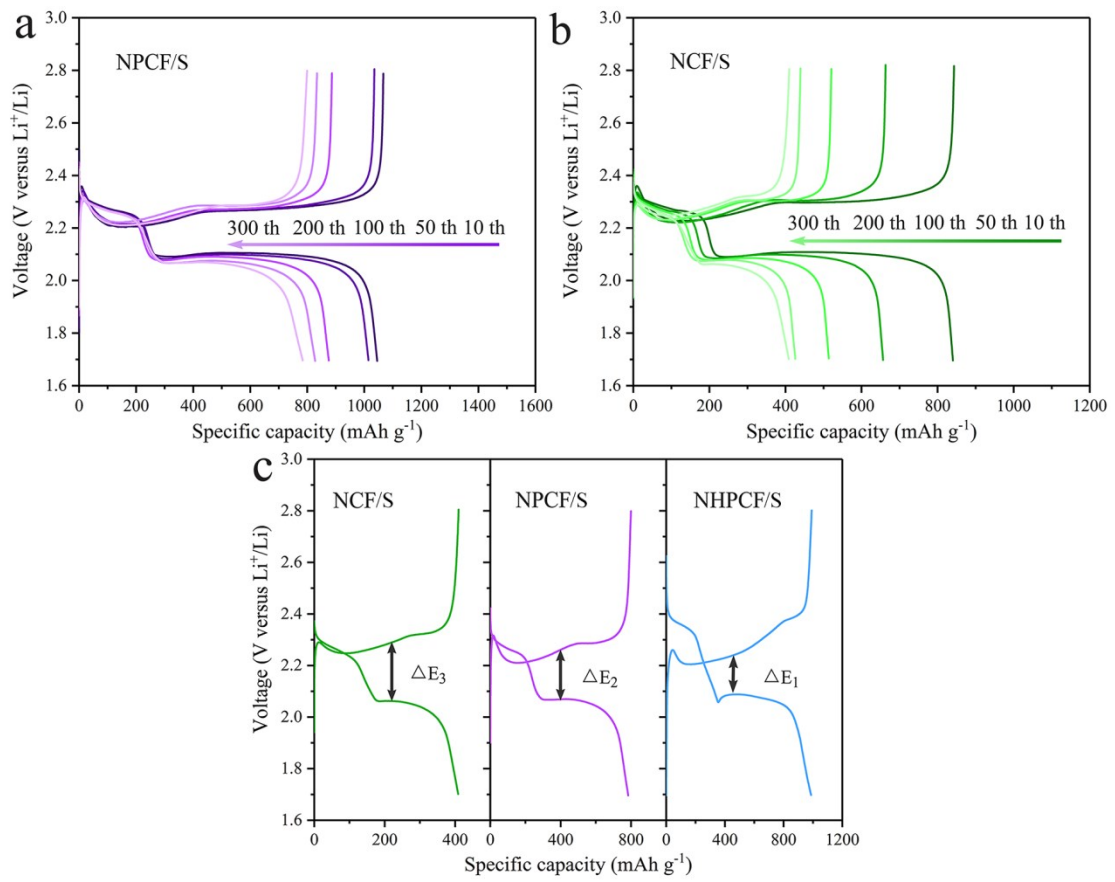

Fig. S7 Galvanostatic discharge-charge curves of different cycles for (a) NPCF/S and (b) NCF/S cathodes at 0.1 C, (c) the 300th discharge-charge curves of the cells with NCF/S, NPCF/S, and NHPCF/S cathodes.



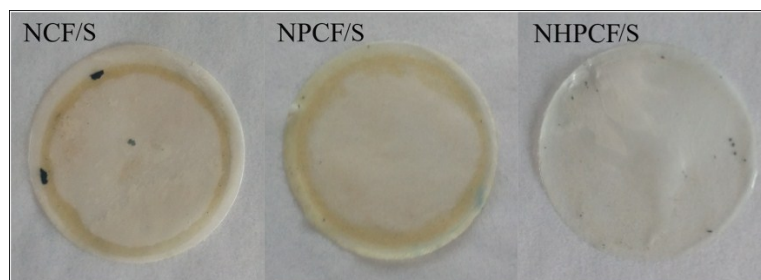

Fig. S8 Photographs of the separators of cells with NCF/S, NPCF/S, and NHPCF/S electrodes after 300 cycles at 0.1 C.

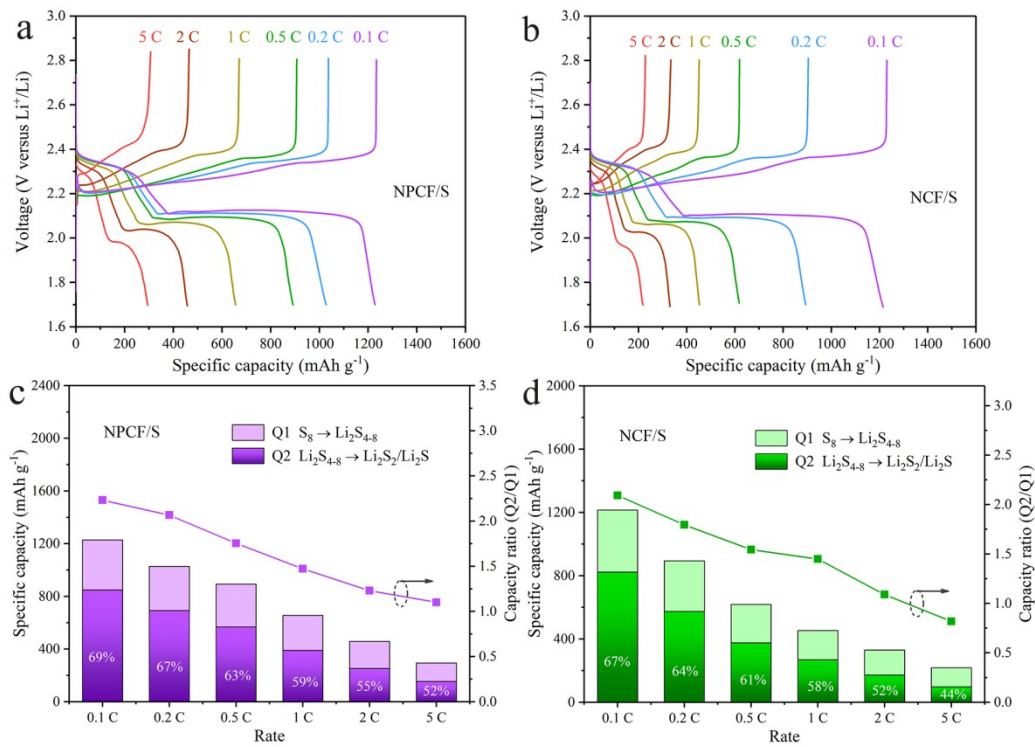

Fig. S9 Galvanostatic discharge-charge voltage profiles of the cells with (a) NPCF/S and (b) NCF/S cathodes at different current rates. Corresponding capacity contribution of the two discharge stages for the cells with (c) NPCF/S and (d) NCF/S cathodes at different current rates.

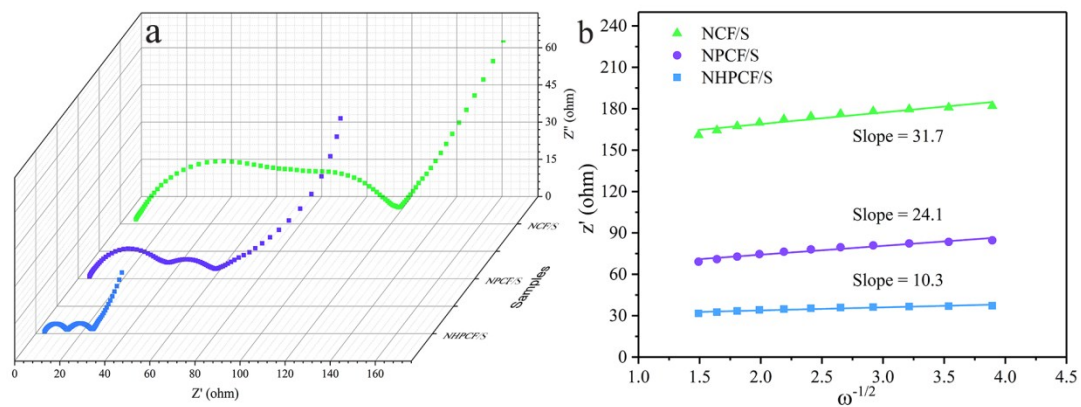

Fig. S10 (a) Nyquist and (b) Warburg plots of NCF/S, NPCF/S, and NHPCF/S electrode after cycling.

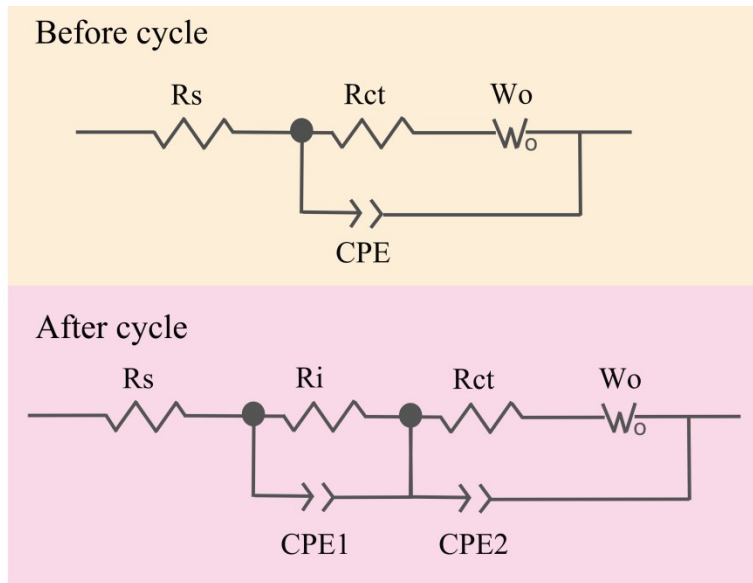

Fig. S11 Equivalent circuit models of the cell before and after charge-discharge cycle. ( $R_s$ : the resistance of the electrolyte;  $R_i$ : the resistance of the insoluble  $Li_2S_2/Li_2S$  layer;  $R_{ct}$ : the charge-transfer resistance; CPE: the corresponding constant phase element;  $W_o$ : the semi-infinite Warburg diffusion impedance.)

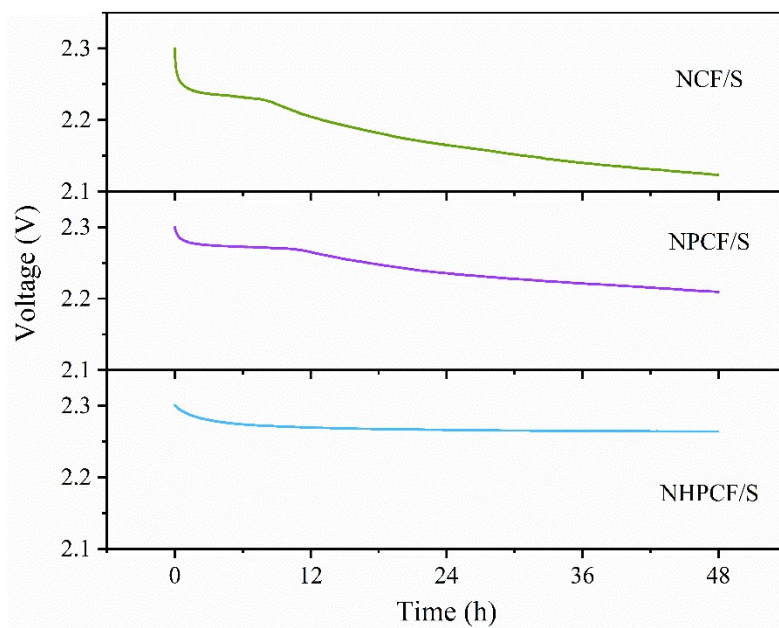

Fig. S12 Open circuit voltage of the cells with NCF/S, NPCF/S, and NHPCF/S electrode during the battery rest after charging to 2.3 V.

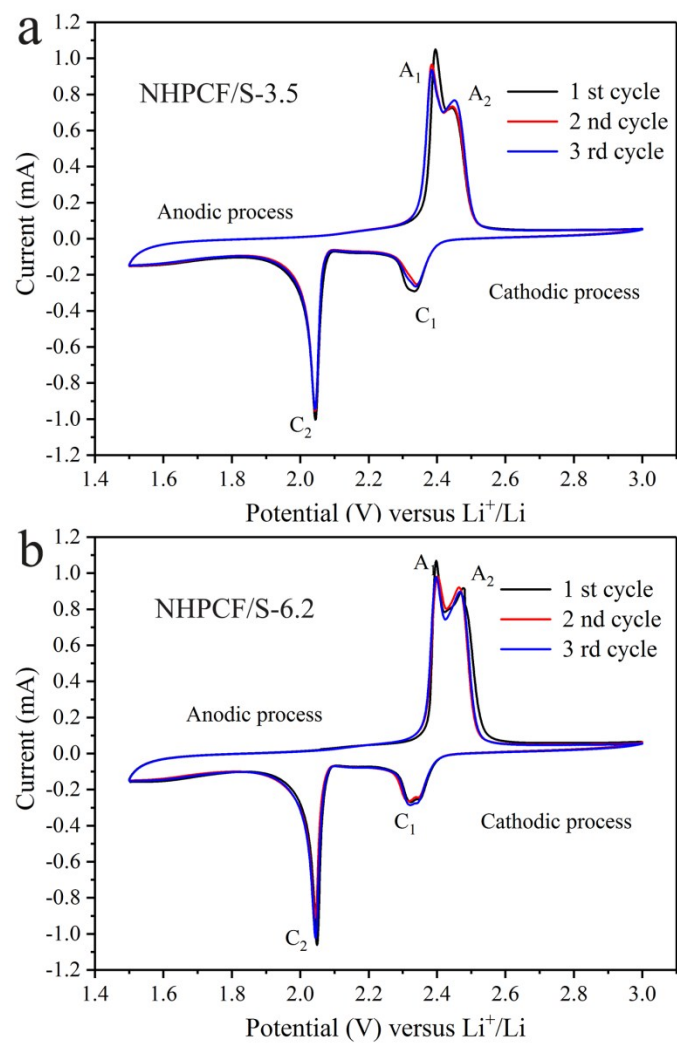

Fig. S13 CV curves of NHPCF/S with high sulfur loading of (a) 3.5 and (b) 6.2  $\text{mg cm}^{-2}$ .

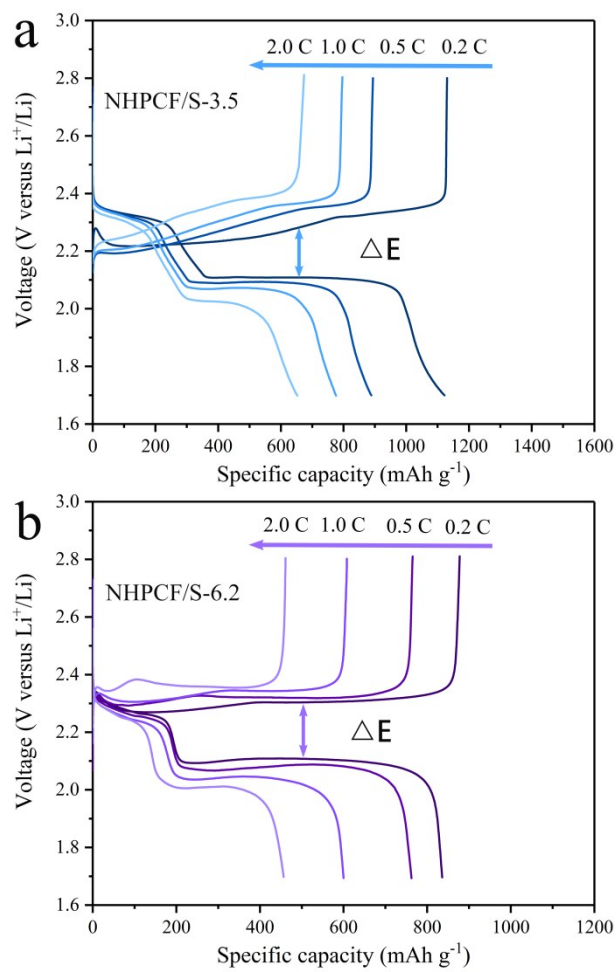

Fig. S14 Galvanostatic discharge–charge voltage profiles of NHPCF/S with high sulfur loading of (a) 3.5 and (b) 6.2 mg cm<sup>-2</sup>.

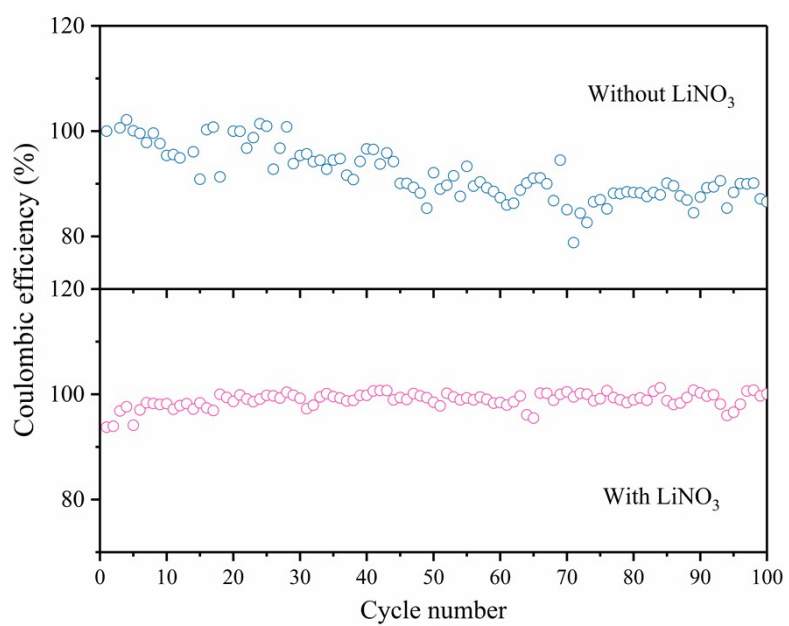

Fig. S15 Coulombic efficiency of the cells with and without LiNO<sub>3</sub> containing electrolyte at rate of 1.0 C.



## Supplementary Table

Table S1 Performance comparisons of present work with reported porous carbon host for Li-S battery.

| Host                                                                           | Sulfur loading (mg cm <sup>-2</sup> ) | Capacity (mAh g <sup>-1</sup> )/Rate | Capacity retention (mAh g <sup>-1</sup> ) | Cycle number | Decay rate per cycle (%) | Ref.      |
|--------------------------------------------------------------------------------|---------------------------------------|--------------------------------------|-------------------------------------------|--------------|--------------------------|-----------|
| Porous carbon                                                                  |                                       | 1200/0.2 C                           | 872                                       | 100          | 0.29                     | 1         |
| Hierarchical porous carbon                                                     |                                       | 1265/500 mA g <sup>-1</sup>          | 643                                       | 50           | 0.98                     | 2         |
| Microporous bamboo carbon                                                      | 1.0                                   | 961/800 mA g <sup>-1</sup>           | 550                                       | 150          | 0.29                     | 3         |
| Hierarchical micro-/mesopores carbon materials                                 | 1.0                                   | 834/0.5 C                            | 600                                       | 500          | 0.056                    | 4         |
|                                                                                |                                       | 658/1 C                              | 586                                       | 200          | 0.055                    |           |
| Three-dimensional porous graphitic carbon                                      | 2.36                                  | 1242/1 C                             | 917                                       | 200          | 0.13                     | 5         |
| 3D graphene nanosheet@carbon nanotube                                          | 1.3-1.6                               | 1373.8/0.1 C                         | 836.5                                     | 200          | 0.20                     | 6         |
| 3D graphene Frameworks                                                         | 1.5                                   | 521/1 C                              | 305                                       | 500          | 0.107                    | 7         |
| Three-dimensional metal carbide MXene/reduced graphene oxide hybrid nanosheets | 1.5                                   | 1144.2/0.5 C                         | 878.4                                     | 300          | 0.077                    | 8         |
| Three dimensional porous cellular carbon framework                             | 1.4-1.6                               | 1108/0.1 C                           | 917.2                                     | 100          | 0.17                     | 9         |
| N-doped porous carbon microspheres                                             | 1.1-1.3                               | 1119.5/0.1 A g <sup>-1</sup>         | 1030.7                                    | 100          | 0.079                    | 10        |
| Hierarchical porous N, O dual doped carbon microrods                           | 1.2                                   | 1327/0.2C                            | 1071                                      | 160          | 0.082                    | 11        |
| Nitrogen-rich mesoporous carbon                                                | 0.7–1.0                               | 1291/0.5 C                           | 643                                       | 200          | 0.25                     | 12        |
| 3D nitrogen doped hierarchical porous carbon framework                         | 2.0                                   | 1228/0.1 C                           | 1000                                      | 300          | 0.06                     | This work |
|                                                                                | 6.5                                   | 650/1 C                              | 425                                       | 500          | 0.069                    |           |

## References

- 1 K. Yang, Q. Gao, Y. Tan, W. Tian, W. Qian, L. Zhu and C. Yang, *Chem.- Eur. J.*, 2016, **22**, 3239.
- 2 S. Wei, H. Zhang, Y. Huang, W. Wang, Y. Xia and Z. Yu, *Energy Environ. Sci.*, 2011, **4**, 736.
- 3 X. Gu, Y. Wang, C. Lai, J. Qiu, S. Li, Y. Hou, W. Martens, N. Mahmood and S. Zhang, *Nano Res.*, 2015, **8**, 129.
- 4 M. K. Rybarczyk, H.-J. Peng, C. Tang, M. Lieder, Q. Zhang and M.-M. Titirici, *Green Chem.*, 2016, **18**, 5169.
- 5 G. Li, J. Sun, W. Hou, S. Jiang, Y. Huang and J. Geng, *Nat. Commun.*, 2016, **7**, 10601.
- 6 Z. Zhang, L. Kong, S. Liu, G. Li and X. Gao, *Adv. Energy Mater.*, 2017, **7**, 1602543.
- 7 J. Cai, Z. Zhang, S. Yang, Y. Min, G. Yang and K. Zhang, *Electrochim. Acta*, 2019, **295**, 900.
- 8 W. Bao, X. Xie, J. Xu, X. Guo, J. Song, W. Wu, D. Su and G. Wang, *Chem.- Eur. J.*, 2017, **23**, 12613.
- 9 Y. Wang, S. Luo, D. Wang, X. Hong and S. Liu, *Electrochim. Acta*, 2018, **284**, 400.
- 10 Y. Xia, R. Fang, Z. Xiao, H. Huang, Y. Gan, Y. Yan, X. Lu, C. Liang, J. Zhang, X. Tao and W. Zhang, *ACS Appl. Mater. Interfaces*, 2017, **9**, 23782.
- 11 N. Wang, Z. Xu, X. Xu, T. Liao, B. Tang, Z. Bai and S. Dou, *ACS Appl. Mater. Interfaces*, 2018, **10**, 13573.
- 12 Y. Qu, Z. Zhang, X. Zhang, G. Ren, Y. Lai, Y. Liu and J. Li, *Carbon* 2015, **84**, 399.
